# Supplementary material for: Exploration of Genome-Wide Recombination Rate Variation Patterns at Different Scales in Pigs
Source: MDPI journal article supplement (doi:10.3390/ani14091345), 2024-04-29
Supplement: s1 [file s1]

# Exploration of Genome-Wide Recombination Rate Variation Patterns at Different Scales in Pigs

Zuoquan Chen, Meng Zhou, Yingchun Sun, Xi Tang, Zhiyan Zhang \* and Lusheng Huang

National Key Laboratory for Swine Genetic Improvement and Germplasm Innovation,  
Jiangxi Agricultural University, Nanchang 330045, China

Correspondence: [bioducklily@hotmail.com](mailto:bioducklily@hotmail.com)



## Supplementary Material

**Table S1** Number of meioses, number of crossovers, and length of genetic map for different populations by sex.

| Population | Sex    | Mesis number | CO number | Map Length(M) |
|------------|--------|--------------|-----------|---------------|
| EH×WD      | Male   | 1001         | 18534     | 18.493        |
| EH×WD      | Female | 983          | 24201     | 23.34         |
| D×L×Y      | Male   | 322          | 5368      | 16.38         |
| D×L×Y      | Female | 102          | 1742      | 21.27         |
| Sutai      | Male   | 409          | 6923      | 17.05         |
| Sutai      | Female | 440          | 9336      | 20.62         |
| Two_Black  | Male   | 425          | 7509      | 17.68         |
| Two_Black  | Female | 399          | 9157      | 22.82         |
| All        | Male   | 2157         | 38334     | 17.78         |
| All        | Female | 2144         | 48062     | 22.42         |

Note: “Sutai” means purebred Sutai pig populations; “Two\_black” means Two black pig populations; “D×L×Y” means the Duroc, Landrace and Yorkshire hybrid Populations; “EH×WD” denotes the Erhualian and white Duroc hybrid pig populations; “All” represents the sum of all population. Hereafter.

**Table S2** Significantly enriched GO terms and KEGG pathway in hotspots enriched around the TSS.

| source | term_name                                                     | term_id    | adjusted_p_value |
|--------|---------------------------------------------------------------|------------|------------------|
| GO:MF  | G protein-coupled receptor activity                           | GO:0004930 | 1.19E-35         |
| GO:MF  | odorant binding                                               | GO:0005549 | 0.000148         |
| GO:MF  | inhibitory MHC class I receptor activity                      | GO:0032396 | 0.015658         |
| GO:MF  | trace-amine receptor activity                                 | GO:0001594 | 0.015658         |
| GO:MF  | peptide antigen binding                                       | GO:0042605 | 0.017215         |
| GO:BP  | detection of chemical stimulus involved in sensory perception | GO:0050907 | 5.39E-32         |
| GO:BP  | antigen processing and presentation of peptide antigen        | GO:0048002 | 0.03183          |
| GO:CC  | plasma membrane                                               | GO:0005886 | 3.46E-12         |
| GO:CC  | MHC class II protein complex                                  | GO:0042613 | 0.033771         |

**Table S3** Motifs enriched for recombinant hotspot sequences.

| Motif Logo                                                                          | E-value  | Sites | Width |
|-------------------------------------------------------------------------------------|----------|-------|-------|
| 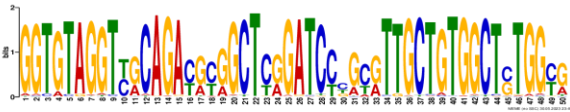   | 8.6e-111 | 3923  | 50    |
|    | 3.4e-120 | 4564  | 47    |
|    | 6.1e-103 | 5192  | 38    |
|    | 2.7e-073 | 3817  | 27    |
|    | 5.4e-077 | 4005  | 41    |
|   | 7.2e-052 | 7067  | 29    |
|  | 2.0e-049 | 1085  | 50    |
|  | 9.4e-036 | 4548  | 21    |
|  | 1.1e-055 | 966   | 41    |
|  | 3.2e-041 | 2735  | 41    |
|  | 2.5e-034 | 1710  | 29    |
|  | 5.9e-024 | 4317  | 21    |
|  | 1.2e-023 | 1086  | 41    |
|  | 3.3e-022 | 1599  | 29    |

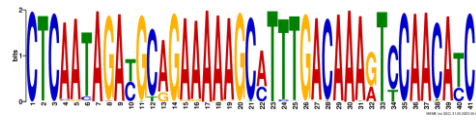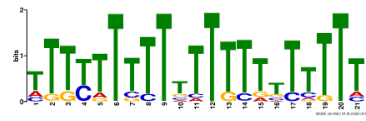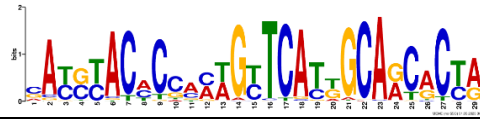

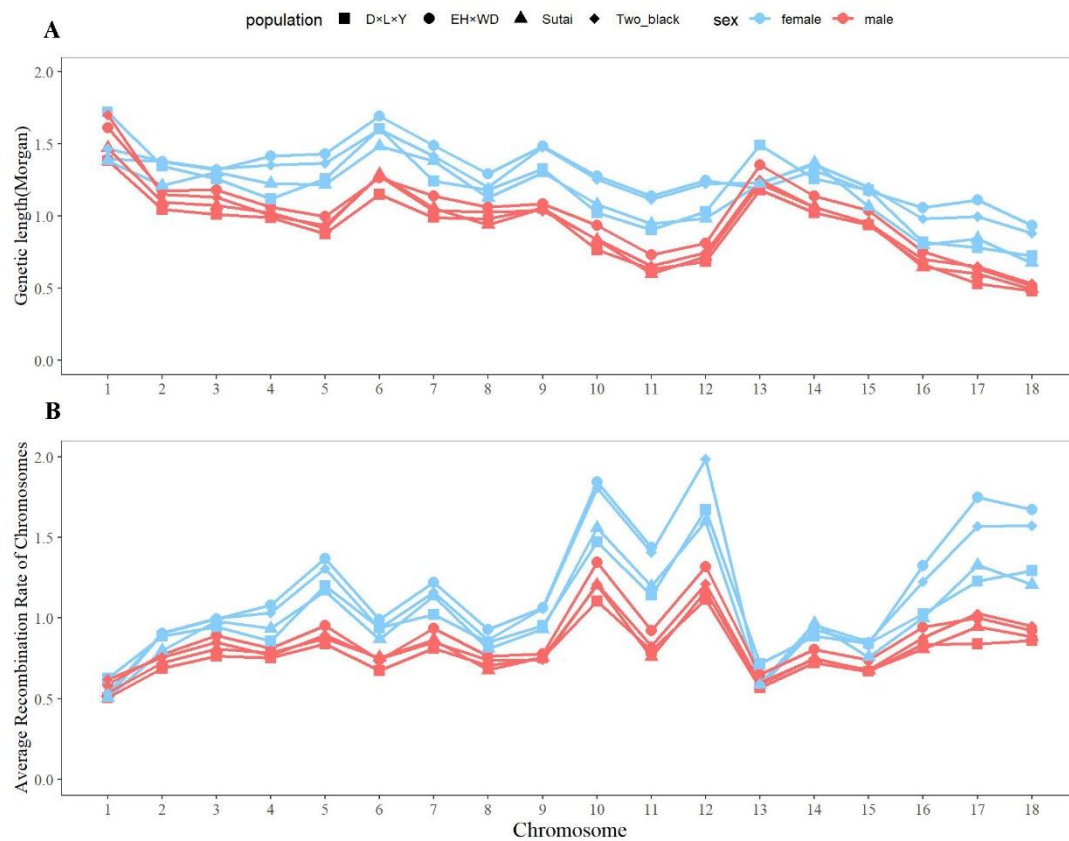

**Figure S1** Differences in mean genetic distances and recombination rates among chromosomes. (A) Line plot of the mean genetic length of chromosomes. (B) Line plot of the average recombination rate of chromosomes. Each line represents a pig breed.

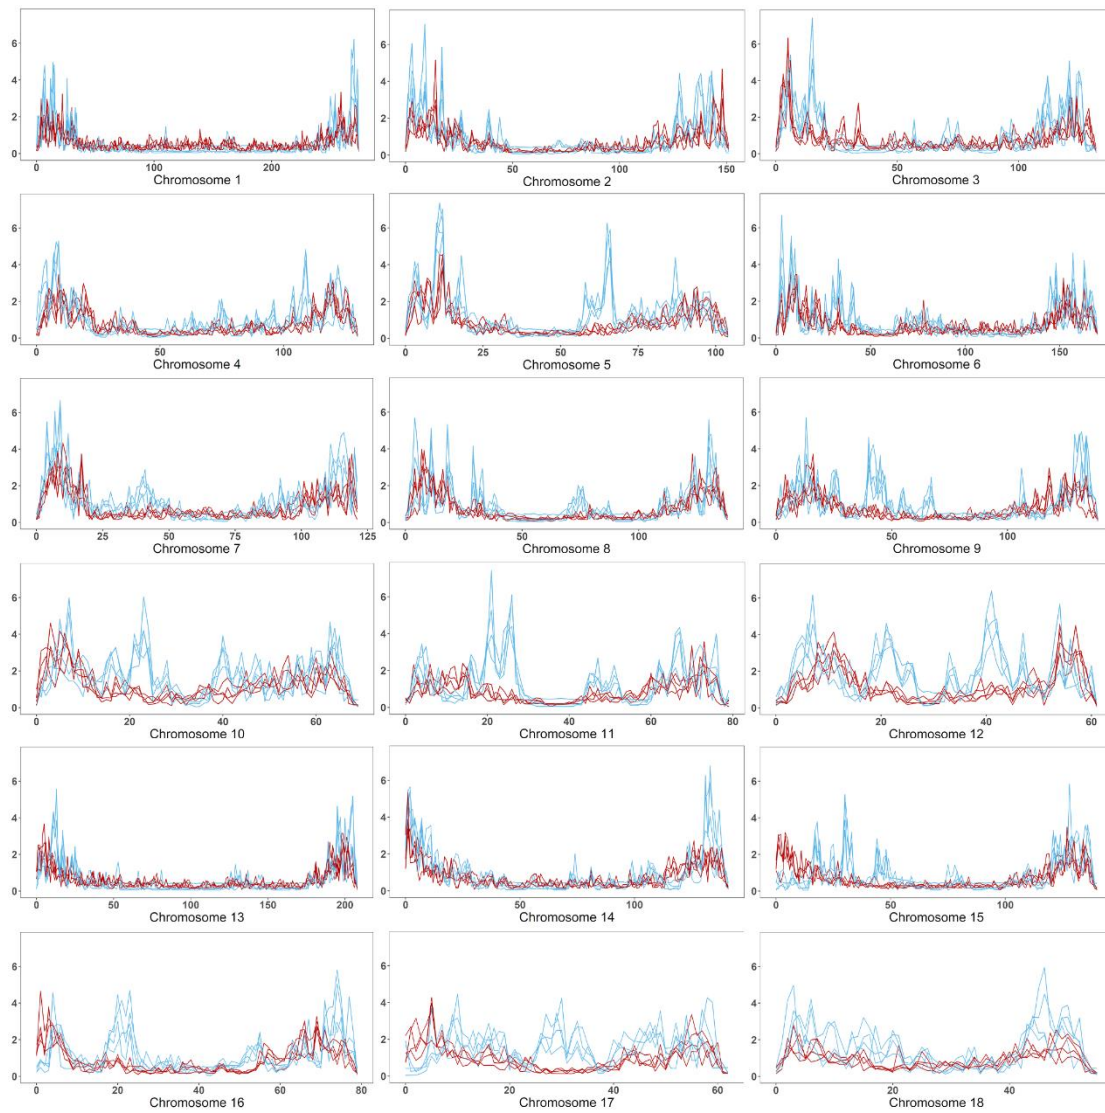

**Figure S2** Landscape of recombination in the pig genome. The lines plot shows the recombination rate along a 1 Mb window of the pig genome (Sscrofa11.1). The sky-blue lines are an estimate for females and the red lines are an estimate for males. Each line corresponds to one of the four populations.



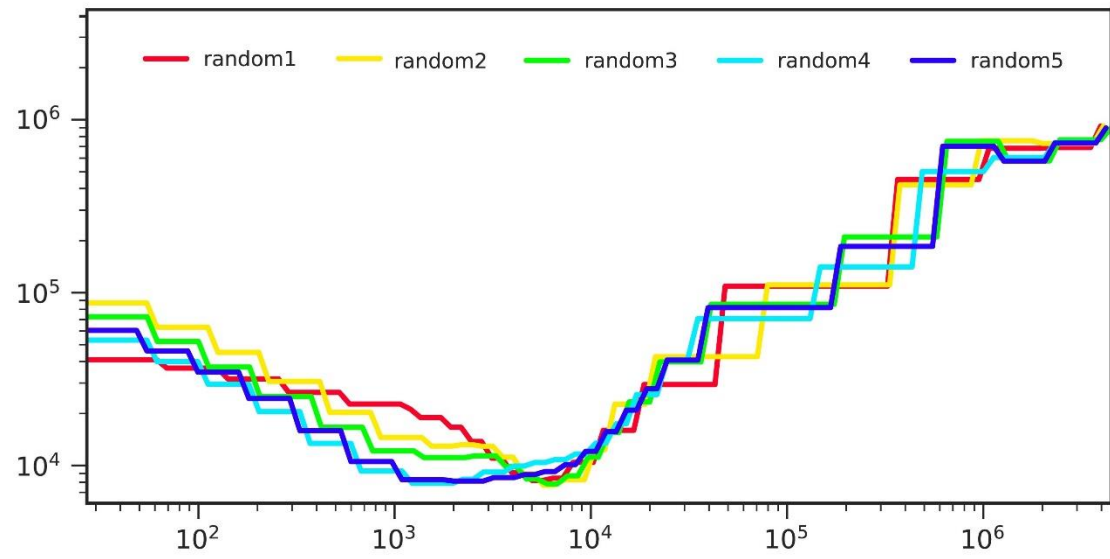

**Figure S3** Population statistical history of 36 unrelated individuals. The various colors correspond to distinct and randomly “distinguished” individual estimates of the population history.

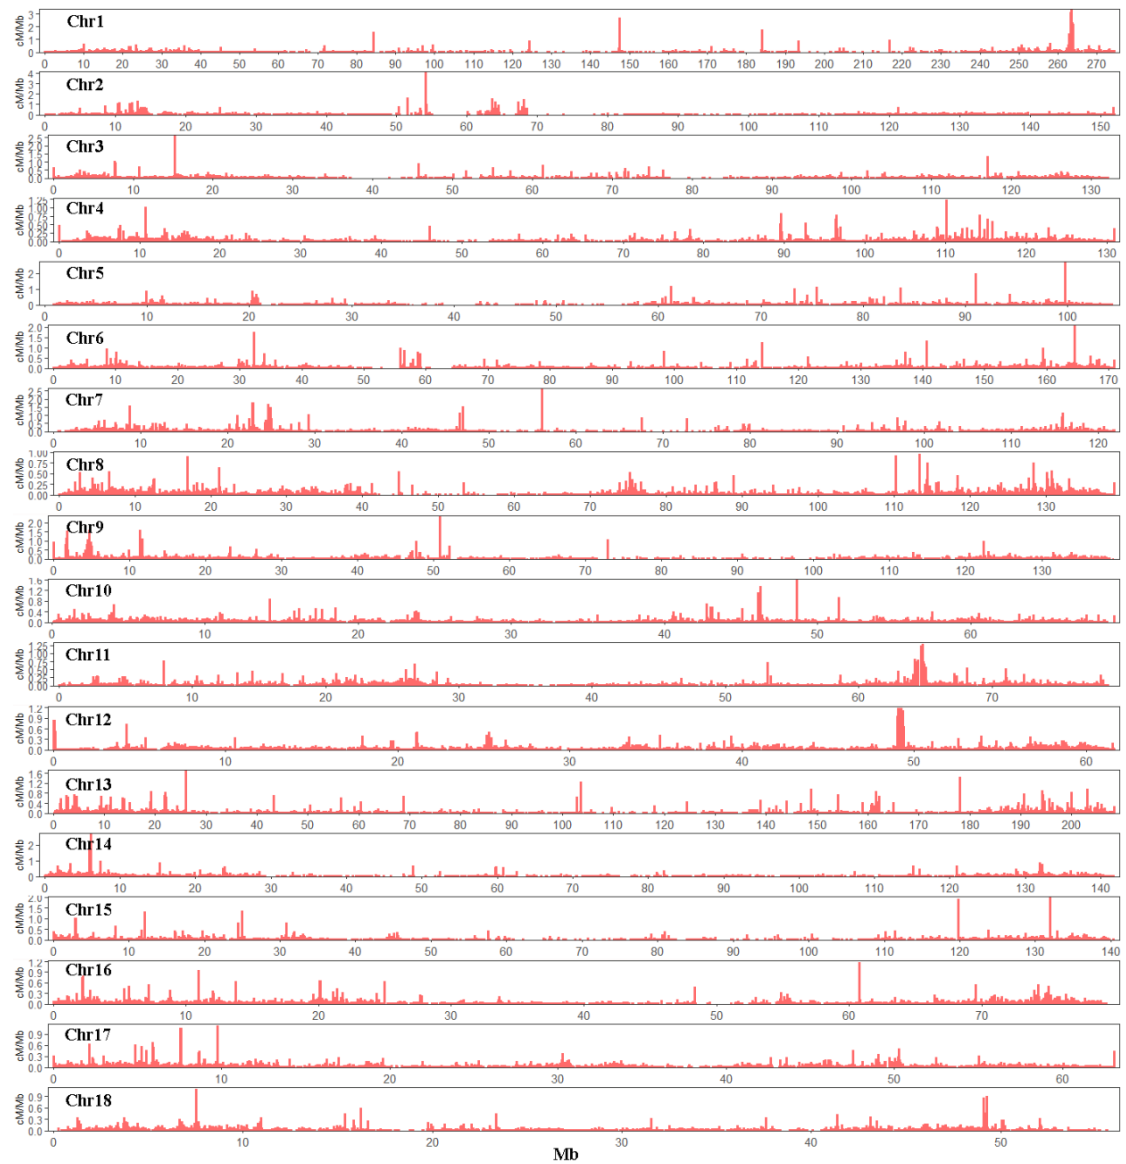

**Figure S4** The fine recombination map of the SNP window was constructed using pyrho. The x-axis represents chromosomal positions, and the y-axis represents estimated recombination rates, with units in centimorgans per megabase (cM/Mb).

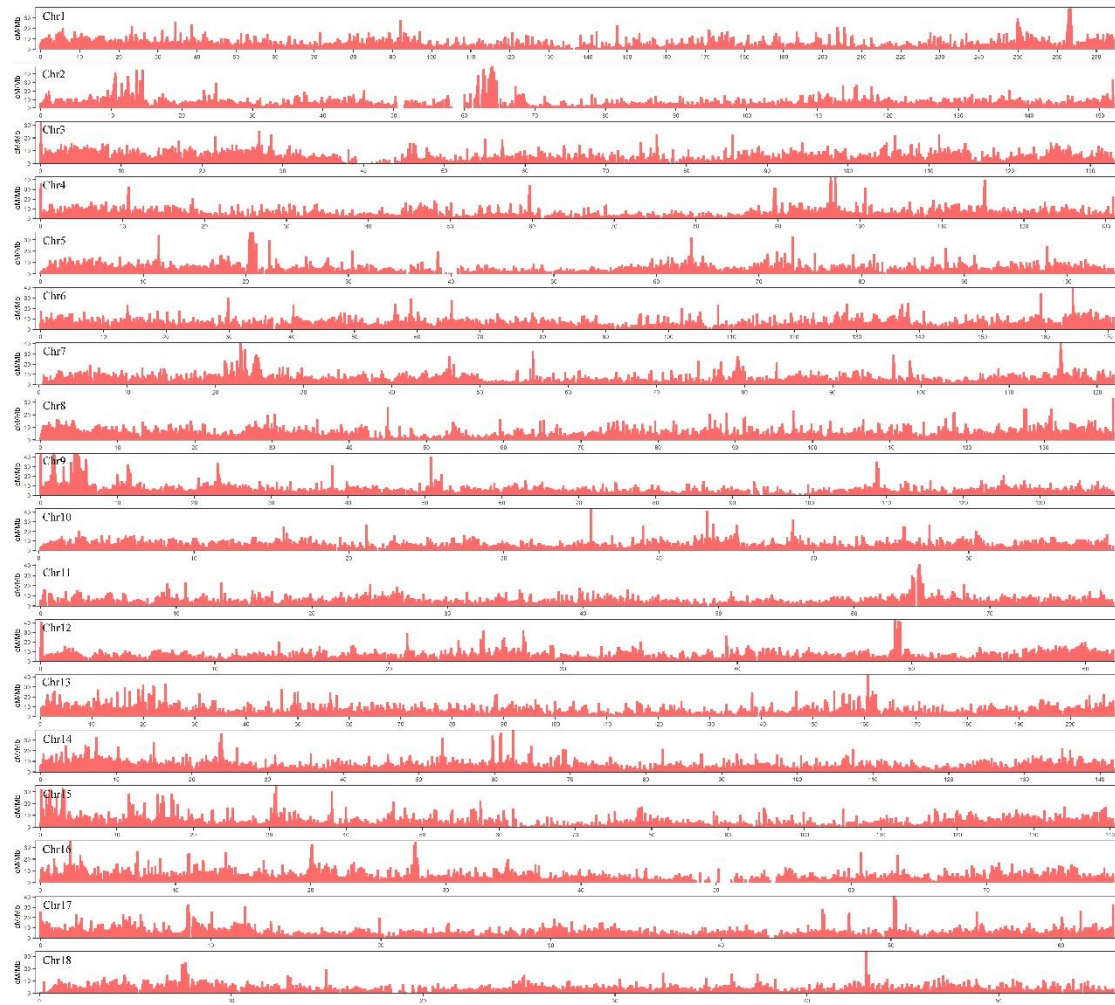

**Figure S5** The fine recombination map of the SNP window was constructed using FastEPRR 5Kb window. The x-axis represents chromosomal positions, and the y-axis represents estimated recombination rates, with units in centimorgans per megabase (cM/Mb).

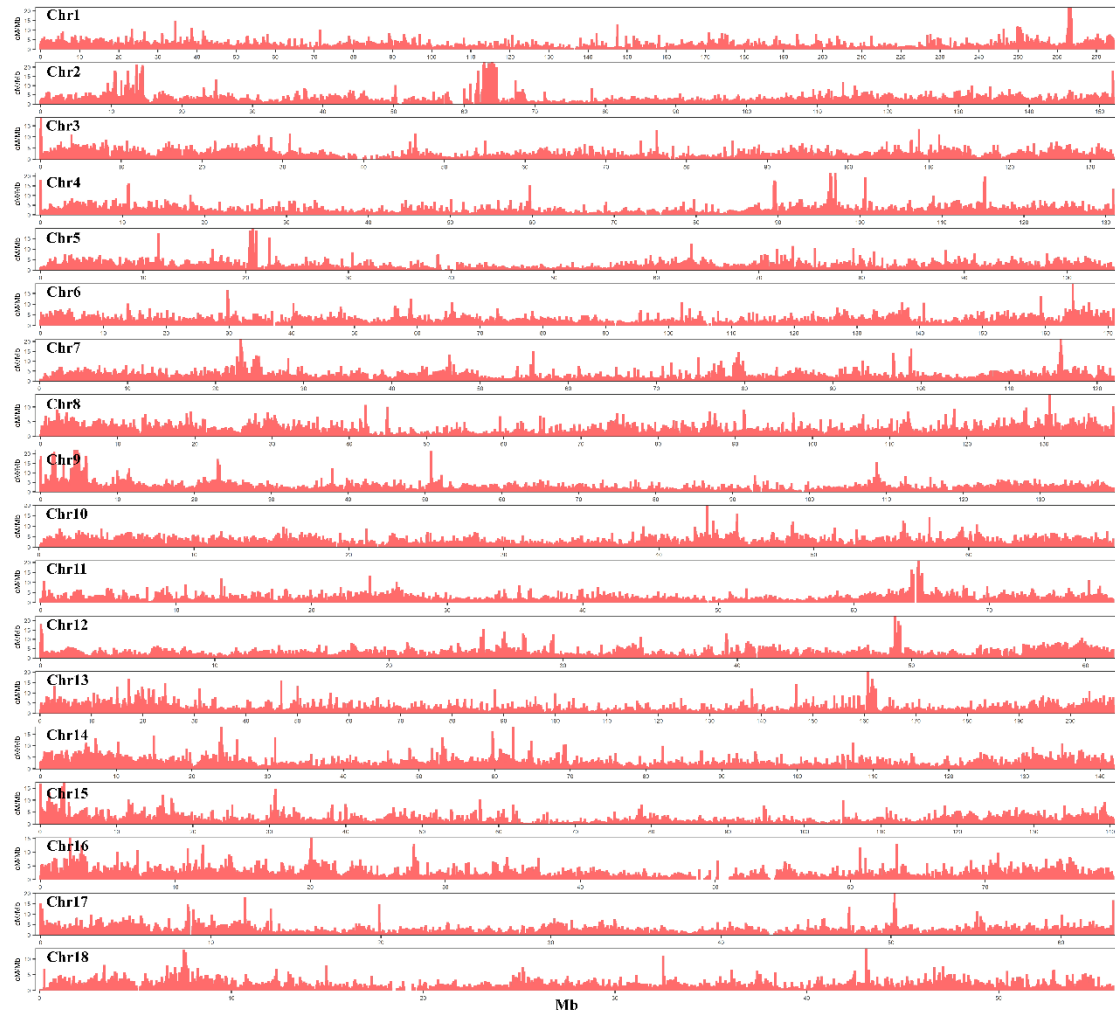

**Figure S6** The fine recombination map of the SNP window was constructed using FastEPRR 10Kb window. The x-axis represents chromosomal positions, and the y-axis represents estimated recombination rates, with units in centimorgans per megabase (cM/Mb).

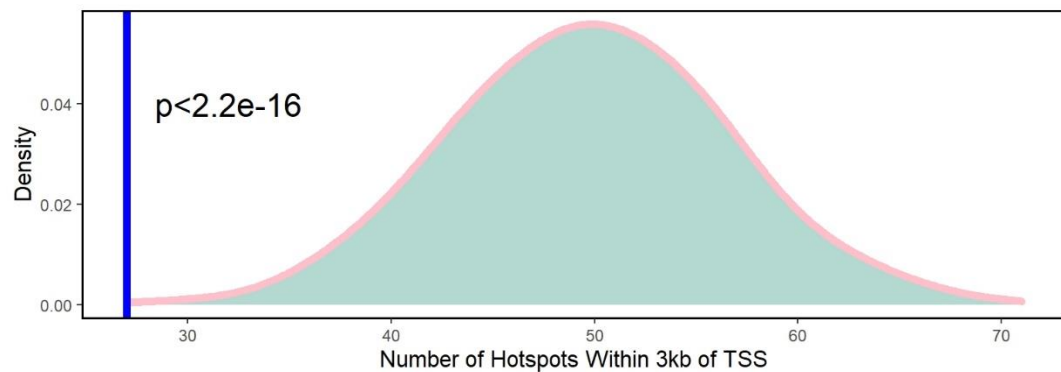

**Figure S7** The number of recombination hotspots overlapping with the broad peaks of H3K4Me3 compared to 1000 simulated “randomly points”. The pink line represents the distribution density of the overlap count between H3K4me3 broad peaks and 1000 randomly selected positions, while the blue line represents the number of recombination hotspots intersecting with H3K4me3 broad peaks. The P-value is calculated by T-test.
